# Supplementary material for: Social Media: A Review and Tutorial of Applications in Medicine and Health Care
Source: PubMed Central journal article supplement (PMC3936280; doi:10.2196/jmir.2912), 2014-02-11
Supplement: jmir_v16i2e13_app2.pdf [file jmir_v16i2e13_app2.pdf]

## Multimedia Appendix 2. A Glossary of Commonly Used Terms on Twitter.

| Terminology         | Definition                                                                                                                                                                                                                                                |
|---------------------|-----------------------------------------------------------------------------------------------------------------------------------------------------------------------------------------------------------------------------------------------------------|
| @                   | The @ sign is used to call out other users within a tweet. When a username is preceded by the @ sign, it becomes a link to a Twitter profile.                                                                                                             |
| Avatar              | The personal image uploaded to a Twitter profile.                                                                                                                                                                                                         |
| Block               | To block someone on Twitter means they will be unable to follow you or add you to their lists, and will not deliver their mentions (see below) to your mentions tab                                                                                       |
| Direct Message (DM) | These are private Tweets between two users.                                                                                                                                                                                                               |
| Favorite            | A tweet marked as favorite saves the message for later viewing.                                                                                                                                                                                           |
| Follow Count        | The number of people that follow a user, as well as how many people that user follows.                                                                                                                                                                    |
| Follower            | A follower is a separate Twitter who follows "you".                                                                                                                                                                                                       |
| Follow Friday       | The most commonly used hashtag #FF, it recommends who other users should follow based on personal experience and interactions with other users. #FF is used on a Friday and it is a form of social courtesy.                                              |
| Following (verb)    | The act of following another user.                                                                                                                                                                                                                        |
| Geotagging          | Tagging (metadata) added to a tweet, which denotes the geographical location from where the message was sent; enabling this feature allows users to disclose where they are in real-time.                                                                 |
| Handle              | A user's "Twitter handle" is the username they have selected and the respective accompanying URL (e.g., <a href="http://twitter.com/username">http://twitter.com/username</a> )                                                                           |
| Hashtag             | The # symbol is used to mark keywords or topics in a Tweet. It serves to search the twitter sphere on a particular topic.                                                                                                                                 |
| Listed              | To be included in another Twitter user's list.                                                                                                                                                                                                            |
| Lists               | These are publicly or individually curated groups of Twitter users. They are often used as a filter to find tweets of users who follow a particular topic (e.g., Cardiologists)                                                                           |
| Mentions            | Mentioning another user in a tweet by including their handle.                                                                                                                                                                                             |
| Reply               | A Tweet posted in reply to another user's message, usually posted by clicking the "reply" button next to their Tweet within a timeline. If the users' twitter timeline are public, it allows people to follow the tweet conversation and response thread. |
| Retweet (noun)      | A Tweet by another user, forwarded to you by someone you follow. Often used to spread news or share valuable information and allows it to spread virally.                                                                                                 |

| <b>Terminology</b> | <b>Definition</b>                                                                                                                                                                                                                          |
|--------------------|--------------------------------------------------------------------------------------------------------------------------------------------------------------------------------------------------------------------------------------------|
| Retweet (verb)     | The act of forwarding another user's Tweet to a user's personal followers                                                                                                                                                                  |
| Search             | A function of twitter (found at <a href="http://search.twitter.com">http://search.twitter.com</a> ) to search for usernames, hashtags, or a particular subject. (This function is generally limited to the past 2 weeks of public tweets.) |
| Short URL (SURL)   | URL shorteners are used to turn long web addresses (URLs) into shorter URLs (e.g., <a href="http://ow.ly/exampleshortlink">http://ow.ly/exampleshortlink</a> ).                                                                            |
| Spam               | Unwanted messaging or following on Twitter.                                                                                                                                                                                                |
| Timeline           | A real-time list of Tweets on Twitter.                                                                                                                                                                                                     |
| Tweet (noun)       | A message posted via Twitter containing 140 characters (or fewer).                                                                                                                                                                         |
| Tweeterer          | An account holder on Twitter who posts and reads Tweets.                                                                                                                                                                                   |
| Unfollow           | To cease following another Twitter user. This will cause their Tweets to no longer show up in a user's home timeline.                                                                                                                      |
| Widget             | A discrete code that allows a twitter user to feature their "tweets" in real time on a different website (e.g., a blog).                                                                                                                   |
